# Supplementary material for: Slug is a direct Notch target required for initiation of cardiac cushion cellularization
Source: PubMed Central journal article supplement — J Cell Biol. 2008 Jul 28;182(2):315–25. doi: 10.1083/jcb.200710067 (PMC2483533; doi:10.1083/jcb.200710067), 2008-07-28
Supplement: jcb.200710067_5.pdf [file jcb.200710067_5.pdf]

Table S1. **Primers used in this study**

| <b>Description</b>                                | <b>Sequence</b>                     |
|---------------------------------------------------|-------------------------------------|
| <b>Human RT-PCR and qRT-PCR</b>                   |                                     |
| Human Slug forward RT-PCR                         | AGA TGC ATA TTC GGA CCCAC           |
| Human Slug reverse RT-PCR                         | CCT CAT GTT TGT GCA GGA GA          |
| Human Snail forward RT-PCR                        | AAT CGG AAG CCT AAC TAC AGC GAG     |
| Human Snail reverse RT-PCR                        | CCT TGG CCT CAG AGA GCT GG          |
| Human Hey1 forward RT-PCR                         | GGA GAG GCG CCG CTG TAG TTA         |
| Human Hey1 reverse RT-PCR                         | CAA GGG CGT GCG CGT CAA AGT A       |
| Human Hey2 forward RT-PCR                         | ACA GGG GGT AAA GGC TAC TTT G       |
| Human Hey2 reverse RT-PCR                         | CTG CTG CTG CTG CGT TT              |
| Human GAPDH forward RT-PCR                        | CCC ATC ACC ATC TTC CAG             |
| Human GAPDH reverse RT-PCR                        | ATG ACC TTG CCC ACA GCC             |
| Human GAPDH forward                               | GCA AAT TCC ATG GCA CCG T           |
| Human GAPDH reverse                               | TCG CCC CAC TTG ATT TTG G           |
| Human Snail forward                               | CCT CAA GAT GCA CAT CCG AAG CCA     |
| Human Snail reverse                               | AGG AGA AGG GCT TCT CGC CAG TGT     |
| Human Slug forward                                | AGA TGC ATA TTC GGA CCC AC          |
| Human Slug reverse                                | CCT CAT GTT TGT GCA GGA GA          |
| Human Tie2 forward                                | CCA TGA AGA TGC GTC AAC AAG         |
| Human Tie2 reverse                                | GTC TGG GAG ACA GAA CAC ATA AGA C   |
| Human CD31 forward                                | CCC AGC CCA GGA TTT CTT AT          |
| Human CD31 reverse                                | ACC GCA GGA TCA TTT GAG TT          |
| Human VE-cadherin forward                         | CAG CCC AAA GTG TGT GAG AA          |
| Human VE-cadherin reverse                         | TGT GAT GTT GGC CGT GTT AT          |
| Human CBF1 forward                                | CTC AGG AAC AAA GGT GGC TCT G       |
| Human CBF1 reverse                                | GGA GTG CCA TGC CAG TAA CTG         |
| Human Hey1 forward                                | AGA GTG CGG ACG AGA ATG GAA ACT     |
| Human Hey1 reverse                                | CGT CGG CGC TTC TCA ATT ATT CCT     |
| Human Hey2 forward                                | TTG AAG ATG CTT CAG GCA ACA GGG     |
| Human Hey2 reverse                                | TCA GGT ACC GCG CAA CTT CTG TTA     |
| Human HeyL forward                                | ATG CAA GCC AGG AAG AAA CGC AGA     |
| Human HeyL reverse                                | AGC TTG GAA GAG CCC TGT TTC TCA     |
| Human Smad7 forward                               | GCC CTC TCT GGA TAT CTT CT          |
| Human Smad7 reverse                               | GCT GCA TAA ACT CGT GGT CA          |
| <b>Mouse qRT-PCR</b>                              |                                     |
| Mouse Snail forward                               | TCT GAA GAT GCA CAT CCG AAG CCA     |
| Mouse Snail reverse                               | AGG AGA ATG GCT TCT CAC CAG TGT     |
| Mouse Slug forward                                | AGA TGC ACA TTC GAA CCC AC          |
| Mouse Slug reverse                                | GTC TGC AGA TGA GCC CTC AG          |
| Mouse Hey1 forward                                | CAC GCC ACT ATG CTC AAT GT          |
| Mouse Hey1 reverse                                | TCT CCC TTC ACC TCA CTG CT          |
| Mouse Hey2 forward                                | TTC TGT CTC TTT CGG CCA CT          |
| Mouse Hey2 reverse                                | TTT GTC CCA GTG CTT GTC TG          |
| Mouse GAPDH forward                               | TGC AGT GGC AAA GTG GAG AT          |
| Mouse GAPDH reverse                               | TTT GCC GTG AGT GGA GTC ATA         |
| <b>shRNA sequences</b>                            |                                     |
| shCSL-A (NM_005349)                               | 367-GCATGGCACTCCCAAGATTGA-387       |
| shCSL-B (NM_005349)                               | 286-GAGTCTCAACCGTGTGCAT-304         |
| shSlug-A (NM_003068)                              | 661-GCATTGTCAGACAGGTCAAAT-681       |
| shSlug-B (NM_003068)                              | 604-GGACACATTAGAACTCACA-622         |
| shSnail (NM_011427)                               | 573-GATGCACATCCGAAGCCAC-591         |
| Random shRNA                                      | GTTCCTGCCACGTCCTAGAT                |
| <b>ChIP Primers</b>                               |                                     |
| ZNF3 forward                                      | AAT CAG CCT GGG TGA CAA GAG TGA     |
| ZNF3 reverse                                      | TCT CTA GAG CCA GCC TTT GCT GTT     |
| Slug (-846) forward                               | CAG GAA ACT GGT AGA TAC TGA GAT GG  |
| Slug (-846) reverse                               | TTG GAA CCA CCG GAC ATT CTC TCA     |
| Slug (-1679) forward                              | AGA CTG TGT AGA GTG AAA CAA GG      |
| Slug (-1679) reverse                              | TCT CCA CAC ACA AAC TGG AAC CTG     |
| <b>EMSA and site directed mutagenesis primers</b> |                                     |
| Slug-EMSA-1700 forward                            | TGT GTG TTT TGT GGG AAA TGG AG      |
| Slug-EMSA-1700 reverse                            | CTC CAT TTC CCA CAA AA              |
| Slug-EMSA-1700 forward mutant                     | TGT GTG TTT TGT GCT GCA TGG AG      |
| Slug-EMSA-1700 reverse mutant                     | CTC CAT GCA GCA CAA AA              |
| Slug-EMSA-900 forward                             | GGC CCT TTT TCC CAT AAA AAA A       |
| Slug-EMSA-900 reverse                             | GGT TTT TTT ATG GGA AAA AGG G       |
| Slug-EMSA-900 forward mutant                      | GGC CCT TTG CAG CAT AAA AAA A       |
| Slug-EMSA-900 reverse mutant                      | GGT TTT TTT ATG CTG CAA AGG G       |
| VE-cadherin-EMSA-97 forward                       | GGG CCA GGG CCA GCT GGA AAA CCT GA  |
| VE-cadherin-EMSA-97 reverse                       | TCA GGT TTT CCA GCT GGC CCT GG      |
| VE-cadherin-EMSA-97 forward mutant                | GGG CCA GGG CAA GCT AGA AAA CCT GA  |
| VE-cadherin-EMSA-97 reverse mutant                | TCA GGT TTT CTA GCT TGC CCT GG      |
| VE-cadherin-EMSA-234 forward                      | GGG GTG ATG ACA CCT GCC TGT AGC AT  |
| VE-cadherin-EMSA-234 reverse                      | GGA ATG CTA CAG GCA GGT GTC ATC AC  |
| VE-cadherin-EMSA-234 forward mutant               | GGG GTG ATG AAA CCT ACC TGT AGC AT  |
| VE-cadherin-EMSA-234 reverse mutant               | GGA ATG CTA CAG GTA GGT TTC ATC AC  |
| VE-cadherin-EMSA-379 forward                      | GGG GTG ATG ACA CCT GCC TGT AGC ATT |
| VE-cadherin-EMSA-379 reverse                      | GGA ATG CTA CAG GCA GGT GTC ATC A   |
| VE-cadherin-EMSA-379 forward mutant               | GGG GTG ATG AAA CCT ACC TGT AGC ATT |
| VE-cadherin-EMSA-379 reverse mutant               | GGA ATG CTA CAG GAA GGT TTC ATC A   |
